# Supplementary material for: Bioinspired photo-responsive membrane enhanced with “light-cleaning” feature for controlled molecule release
Source: Royal Society of Chemistry journal article supplement (doi:10.1039/d1tb02329b), 2021-12-23
Supplement: d1tb02329b1.pdf [file d1tb02329b1.pdf]

## Supplementary Information

### **Bioinspired photo-responsive membrane enhanced with the “light-cleaning” feature for controlled molecule release**

Qisheng Ye<sup>1,2</sup>; Rui Wang<sup>1,2</sup>; Saitao Yan<sup>1,2</sup>; Baoliang Chen<sup>1,2</sup>; Xiaoying Zhu<sup>1,2\*</sup>

*1. Department of Environmental Science, Zhejiang University, Hangzhou, Zhejiang 310058, China*

*2. Zhejiang Provincial Key Laboratory of Organic Pollution Process and Control, Hangzhou  
310058, China*

\*Corresponding author:

Dr. Xiaoying Zhu, [zhux@zju.edu.cn](mailto:zhux@zju.edu.cn)

Tel.: +86-571-88982651

Fax: +86-571-88982651

Co-authors:

Qisheng Ye, [qsye@zju.edu.cn](mailto:qsye@zju.edu.cn)

Rui Wang, [ruiw@zju.edu.cn](mailto:ruiw@zju.edu.cn)

Saitao Yan, [yansaitao@zju.edu.cn](mailto:yansaitao@zju.edu.cn)

Baoliang Chen, [blchen@zju.edu.cn](mailto:blchen@zju.edu.cn)

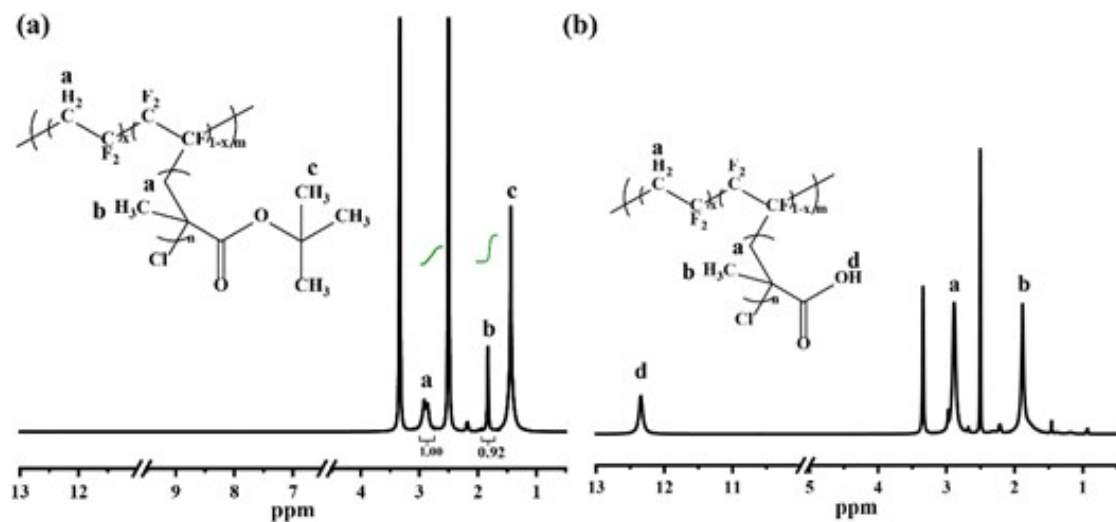

Figure S1.  $^1\text{H}$  NMR spectra of (a) P(VDF-CTFE)-PtBMA and (b) P(VDF-CTFE)-PMAA.

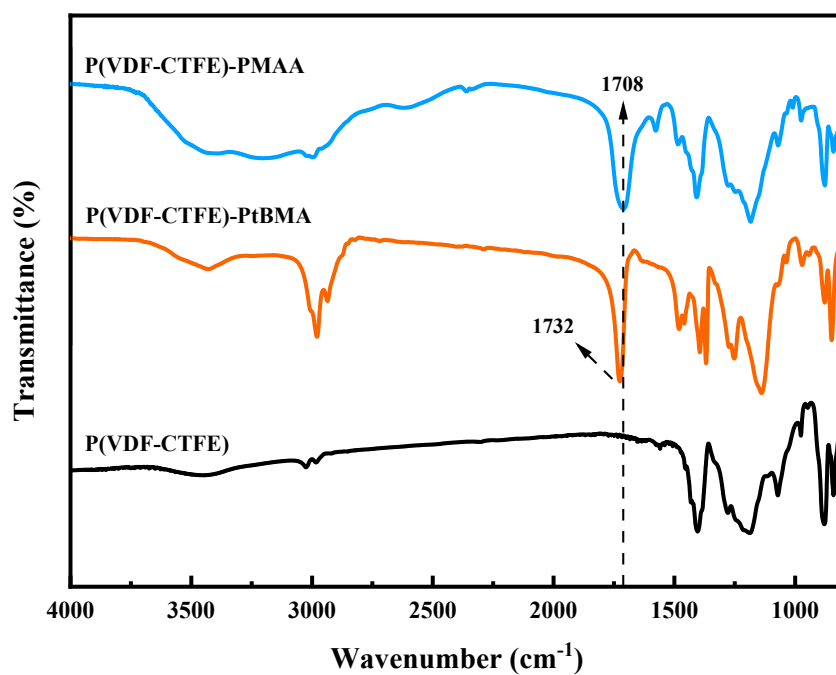

Figure S2. FTIR spectra of P(VDF-CTFE), P(VDF-CTFE)-PtBMA and P(VDF-CTFE)-PMAA.

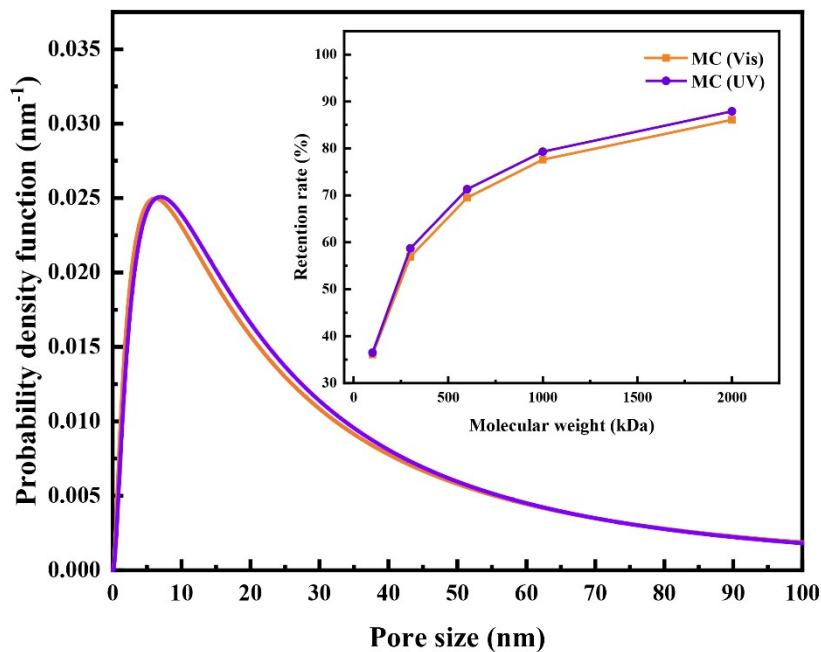

Figure S3. Pore size distribution of MC at Vis and UV determined by retention of PEG/PEOs with different molecular weights.

Table S1. Average pore diameters and standard deviations of PRMs

| Membrane | Vis                        |                         | UV                         |                         | Variation ratio |
|----------|----------------------------|-------------------------|----------------------------|-------------------------|-----------------|
|          | Average pore diameter (nm) | Standard deviation (nm) | Average pore diameter (nm) | Standard deviation (nm) |                 |
| MC       | 27.6                       | 3.4                     | 26.9                       | 3.2                     | -3%             |
| M1       | 11.9                       | 2.1                     | 15.1                       | 2.1                     | 27%             |
| M2       | 9.0                        | 1.9                     | 12.8                       | 2.2                     | 42%             |
| M3       | 6.6                        | 2.1                     | 12.3                       | 1.9                     | 86%             |

Table S2. Water flux of MC, M1, M2 and M3 in Vis and UV

| Flux (L m <sup>-2</sup> h <sup>-1</sup> ) | Irradiation | MC        | M1        | M2        | M3        |
|-------------------------------------------|-------------|-----------|-----------|-----------|-----------|
|                                           |             | Vis       | 105.0±1.6 | 164.3±3.3 | 113.8±2.4 |
|                                           | UV          | 104.4±3.1 | 206.4±4.8 | 172.3±5.4 | 140.1±3.0 |

Table S3 Z-average sizes of micelles prepared by L1, L2, and L3 at Vis and UV

| Polymer |     | Z-average (d. nm) |
|---------|-----|-------------------|
| L1      | Vis | 294.5±5.5         |
| L2      |     | 333.7±2.9         |
| L3      |     | 355.3±3.9         |
| L1      | UV  | 358.4±4.0         |
| L2      |     | 404.6±5.6         |
| L3      |     | 511.8±4.2         |

Table S4. Water contact angle of MC, M1, M2 and M3 at Vis and UV

| Membrane          |     | MC       | M1       | M2       | M3       |
|-------------------|-----|----------|----------|----------|----------|
| Contact Angle (°) | Vis | 42.6±1.6 | 27.2±1.4 | 31.7±2.5 | 38.9±2.3 |
|                   | UV  | 42.3±1.2 | 24.6±1.8 | 26.5±2.2 | 31.4±2.1 |

Table S5. Relative flux decay (RFD), relative flux recovery (RFR) and relatively flux recovery after “light-cleaning” (RFRL) of LRMs in BSA solution filtration experiments.

| Membrane | $J_0$ | $J_p$ | $J_w$ | $J_L$ | RFD  | RFR  | RFRL | Retention |
|----------|-------|-------|-------|-------|------|------|------|-----------|
|          | (LMH) | (LMH) | (LMH) | (LMH) | (%)  | (%)  | (%)  | (%)       |
| MC       | 105.3 | 50.0  | 69.1  | 69.2  | 52.5 | 65.7 | 66.5 | 42        |
| M1       | 162.7 | 102.3 | 125.1 | 143.3 | 37.1 | 76.9 | 88.1 | 74        |
| M2       | 112.4 | 66.1  | 81.7  | 104.1 | 41.0 | 72.7 | 92.6 | 79        |
| M3       | 63.3  | 34.7  | 43.9  | 57.2  | 45.2 | 69.4 | 90.3 | 81        |

Note:  $J_0$ : initial pure water flux,  $J_p$ : final flux of pollutant filtration,  $J_w$ : recovered pure water flux after backflushing,  $J_L$ : recovered pure water flux after light-cleaning enhanced backflushing

Table S6. Relative flux decay (RFD), relative flux recovery (RFR) and relatively flux recovery after “light-cleaning” (RFRL) of LRMs in *E. coli* solution filtration experiments.

| Membrane | $J_0$ | $J_p$ | $J_w$ | $J_L$ | RFD  | RFR  | RFRL | Retention |
|----------|-------|-------|-------|-------|------|------|------|-----------|
|          | (LMH) | (LMH) | (LMH) | (LMH) | (%)  | (%)  | (%)  | (%)       |
| MC       | 106.8 | 43.7  | 65.6  | 68.9  | 59.1 | 61.4 | 64.5 | 99        |
| M1       | 165.3 | 92.6  | 115.4 | 120.1 | 44.0 | 69.8 | 87.2 | 99        |
| M2       | 117.9 | 61.0  | 81.1  | 107.6 | 48.3 | 68.8 | 91.3 | 99        |
| M3       | 65.7  | 30.2  | 43.4  | 59.7  | 54.1 | 66.1 | 90.8 | 99        |

Table S7. Relative flux decay (RFD), relative flux recovery (RFR) and relatively flux recovery after “light-cleaning” (RFRL) of M2 in two cycle of BSA and *E. coli* solution filtration experiments.

| Membrane                       | $J_0$ | $J_p$ | $J_L$ | RFD  | RFRL | Retention |
|--------------------------------|-------|-------|-------|------|------|-----------|
|                                | (LMH) | (LMH) | (LMH) | (%)  | (%)  | (%)       |
| 1 <sup>st</sup> BSA            | 112.4 | 66.1  | 104.1 | 41.0 | 92.6 | 79        |
| 2 <sup>nd</sup> BSA            |       | 60.8  | 101.7 | 45.9 | 90.5 | 80        |
| 1 <sup>st</sup> <i>E. coli</i> | 117.9 | 61.0  | 107.6 | 48.3 | 91.3 | 99        |
| 2 <sup>nd</sup> <i>E. coli</i> |       | 59.5  | 108.2 | 50.5 | 91.8 | 99        |

Note: 1<sup>st</sup> : the first cycle, 2<sup>nd</sup> : the second cycle.

Table S8. Concentration of PVP and PEO3 in permeate at Vis or UV after different filtration cycles

by M3.

| Cycle No.         | 1    | 2    | 3    | 4    | 5   | Total amount (mg) |                   |
|-------------------|------|------|------|------|-----|-------------------|-------------------|
| PVP at Vis (mg/L) | 41.4 | 27.9 | 22.5 | 7.6  | 0.3 | 0.997             |                   |
| Cycle No.         | 6    | 7    | 8    | 9    | 10  | 11                | Total amount (mg) |
| PEO3 at UV (mg/L) | 35.3 | 24.8 | 19.5 | 13.6 | 5.2 | 0                 | 0.984             |

Note: 9.5 mL of the DI water was added to the filtration cell after every filtration cycle.
